# Supplementary material for: Fluvoxamine for the Early Treatment of COVID-19: A Meta-analysis of Randomized Clinical Trials
Source: PubMed Central journal article supplement (PMC9128689; doi:10.4269/ajtmh.21-1310), 2022-03-09
Supplement: tpmd211310.SD1.pdf [file tpmd211310.SD1.pdf]

## Supplemental Figure S1: GRADE level of certainty for fluvoxamine compared to placebo for COVID-19

Question: Fluvoxamine compared to Placebo for COVID-19

Setting: Outpatients

| No of studies          | Study design      | Certainty assessment     |                          |                          |                          |                      | No of patients |                  | Effect                 |                                                | Certainty        | Importance |
|------------------------|-------------------|--------------------------|--------------------------|--------------------------|--------------------------|----------------------|----------------|------------------|------------------------|------------------------------------------------|------------------|------------|
|                        |                   | Risk of bias             | Inconsistency            | Indirectness             | Imprecision              | Other considerations | Fluvoxamine    | Placebo          | Relative (95% CI)      | Absolute (95% CI)                              |                  |            |
| <b>Primary Outcome</b> |                   |                          |                          |                          |                          |                      |                |                  |                        |                                                |                  |            |
| 3                      | randomised trials | not serious <sup>a</sup> | Serious <sup>b</sup>     | not serious <sup>c</sup> | not serious <sup>d</sup> | none                 | 94/1093 (8.6%) | 143/1103 (13.0%) | RR 0.69 (0.54 to 0.88) | 40 fewer per 1,000 (from 60 fewer to 16 fewer) | ⊕⊕⊕○<br>Moderate | IMPORTANT  |
| <b>Hospitalization</b> |                   |                          |                          |                          |                          |                      |                |                  |                        |                                                |                  |            |
| 3                      | randomised trials | not serious <sup>a</sup> | not serious <sup>d</sup> | not serious <sup>g</sup> | not serious <sup>h</sup> | none                 | 84/1093 (7.7%) | 111/1103 (10.1%) | RR 0.79 (0.60 to 1.03) | 21 fewer per 1,000 (from 40 fewer to 3 more)   | ⊕⊕⊕⊕<br>High     | IMPORTANT  |

CI: confidence interval; RR: risk ratio

### Explanations

- a. No issues were detected as studies have a low risk of bias
- b. Outcomes are not directly comparable as a combination of clinical deterioration and hospitalization is used
- c. No issues were detected with indirectness
- d. No issues were detected with imprecision
- e. No issues were detected as studies have a low risk of bias
- f. No issues were detected as outcomes are directly comparable
- g. No issues were detected with indirectness
- h. No issues were detected with imprecision
